# Supplementary material for: Comparative Analysis of Reproductive Organs, Hormones and Blood Metabolism of MSTN Mutated and Non-mutated Cows during Gestation
Source: Research Square preprint supplement (doi:10.21203/rs.3.rs-5694255/v1), 2025-03-21
Supplement: Supplementary file 1 [file 1f5e9e36fb52909d0bb65cf1.docx]

| **Items** | **Value (as a percentage of total mass, %)** |
| --- | --- |
| Raw material | |
| Corn silage | 50.00 |
| Alfalfa hay | 25.00 |
| Corn | 16.25 |
| Soybean meal | 5.00 |
| Soybean flour | 1.00 |
| DDGS | 1.60 |
| Calcium carbonate | 0.25 |
| Calcium bicarbonate | 0.25 |
| Sodium chloride | 0.25 |
| Premix | 0.40 |
| Chemical components | |
| Dry matter | 50.43 |
| Crude protein | 17.10 |
| Crude fat | 1.96 |
| Crude fiber | 1.50 |
| Neutral detergent fiber (NDF) | 42.76 |
| Acid detergent fiber (ADF) | 23.90 |
| Crude ash | 6.87 |
| Calcium | 0.76 |
| Phosphorus | 0.35 |
| Sodium chloride | 0.25 |
| Lysine | 0.08 |

**Table S1** Feed Ingredients and Nutritional Composition.
